# Supplementary material
Source: Frontiers journal article supplement (https://www.frontiersin.org/articles/261479)

**Supplementary Figure 1.** Relationships between midday stem water potential over the growing season and several berry traits for red cultivars: (A) fresh weight, (B) total soluble solids, (C) titratable acidity, and (D) anthocyanins concentration.

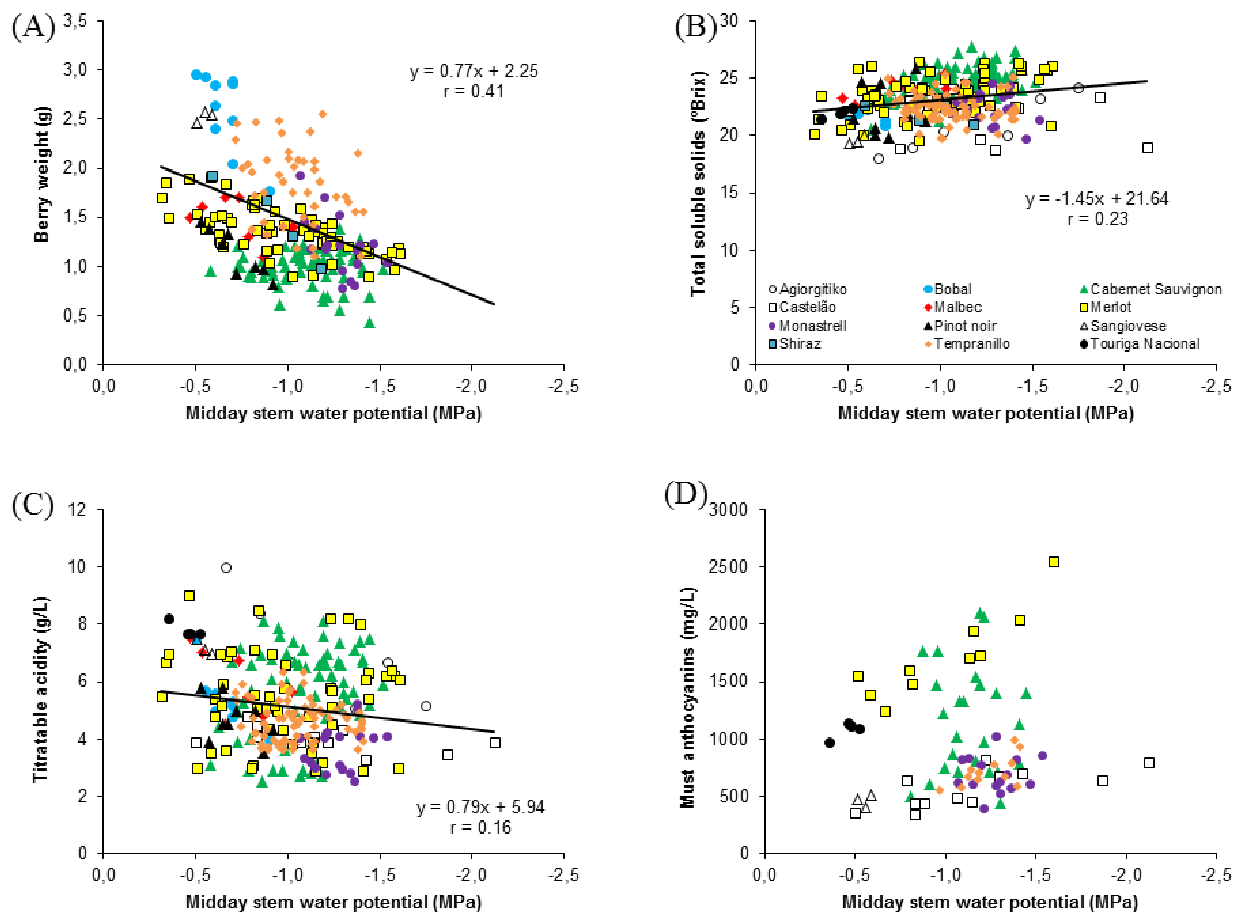

Supplement: Image_1.PDF [file Image_1.PDF]
