# Supplementary material
Source: Frontiers journal article supplement (https://www.frontiersin.org/articles/261479)

**Supplementary Figure 2.** Relationships between midday stem water potential over the growing season and several berry traits for white cultivars: (A) fresh weight, (B) total soluble solids, (C) titratable acidity, and (D) wine titratable acidity.

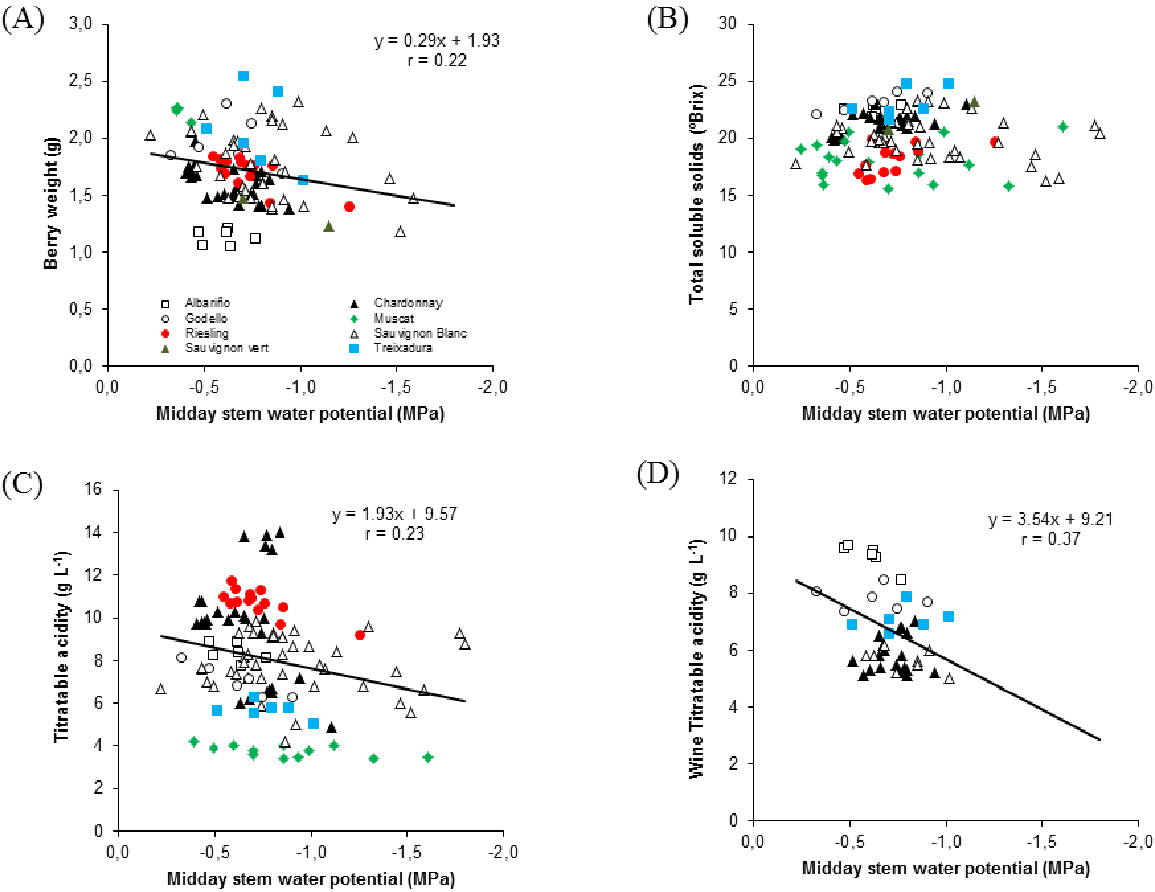

Supplement: Image_2.PDF [file Image_2.PDF]
